# Supplementary material for: X chromosome dosage drives statin-induced dysglycemia and mitochondrial dysfunction
Source: PubMed Central journal article supplement (PMC11219728; doi:10.1038/s41467-024-49764-2), 2024-07-02
Supplement: 41467_2024_49764_MOESM1_ESM.pdf [file 41467_2024_49764_MOESM1_ESM.pdf]

**Supplemental Data for Zhang et al. "X chromosome dosage drives statin-induced dysglycemia and mitochondrial dysfunction"**

**Supplementary Table 1: Gene expression and genotyping PCR primers**

|                         |                                |
|-------------------------|--------------------------------|
| <i>Gclc</i> (forward)   | 5'- TGCACATCTACCACGCAGTCAA -3' |
| <i>Gclc</i> (reverse)   | 5'- TCAAGAACATCGCCTCCATTCA -3' |
| <i>Glud1</i> (forward)  | 5'- GCAACCATGTGTTGAGCCTCT -3'  |
| <i>Glud1</i> (reverse)  | 5'- CCACAGCGCACTTGTATGTCA -3'  |
| <i>Got1</i> (forward)   | 5'- CGCCTAGTTCTTGGGGACAAC-3'   |
| <i>Got1</i> (reverse)   | 5'- TCCCAGGTTGGTGATGATACG -3'  |
| <i>Fasn</i> (forward)   | 5'- GTTGGCCCAGAACTCCTGTA -3'   |
| <i>Fasn</i> (reverse)   | 5'- GTCGTCTGCCTCCAGAGC -3'     |
| <i>Acaca</i> (forward)  | 5'- GCCTCTTCCTGACAAACGAG -3'   |
| <i>Acaca</i> (reverse)  | 5'- TGA CTGCCGAAACATCTCTG -3'  |
| <i>Elovl6</i> (forward) | 5'- GATGACCAAAGGCCTGAAGC -3'   |
| <i>Elovl6</i> (reverse) | 5'- GTGGTGGTACCAGTGCAGGA -3'   |

**Genotyping primers**

|                         |                                |
|-------------------------|--------------------------------|
| <i>Tg Sry</i> (forward) | 5'- AGCCCTACAGCCACATGATA -3'   |
| <i>Tg Sry</i> (reverse) | 5'- GTCTTGCCTGTATGTGATGG -3'   |
| <i>Ymt</i> (forward)    | 5'- CTGGAGCTCTACAGTGATGA -3'   |
| <i>Ymt</i> (reverse)    | 5'- CAGTTACCAATCAACACATCAC -3' |
| <i>Myo</i> (forward)    | 5'- TTACGTCCATCGTGGACAGCAT -3' |
| <i>Myo</i> (reverse)    | 5'- TGGGCTGGGTGTTAGTCTTAT -3'  |
| oIMR0180                | 5'- GCCTAGCCGAGGGAGAGCCG -3'   |
| oIMR0181                | 5'- TGTGACTTGGGAGCTCTGCAGC -3' |
| oIMR0182                | 5'- GCCGCCCGACTGCATCT -3'      |

**Supplementary Table 2: Summary demographics and clinical characteristics of individuals from whom iPSCs were developed**

|                                      | Male           |                    | Female         |                   |
|--------------------------------------|----------------|--------------------|----------------|-------------------|
|                                      | Control        | Case               | Control        | Case              |
| <b>Population</b>                    |                |                    |                |                   |
| Total Count                          | 3              | 3                  | 3              | 3                 |
| Age <sup>1</sup> (mean ± SD)         | 63.00 ± 7.25   | 59.00 ± 3.55       | 62.67 ± 8.73   | 67.67 ± 6.18      |
| Race/Ethnicity                       | White          |                    |                |                   |
| <b>Statin Type - Initial</b>         |                |                    |                |                   |
| Lovastatin (%)                       | 66.7           | 66.7               | 66.7           | 66.7              |
| Simvastatin (%)                      | 33.3           | 33.3               | 33.3           | 33.3              |
| DDD <sup>2</sup> (mean ± SD)         | 0.83 ± 0.23    | 1.00 ± 0.00        | 0.92 ± 0.77    | 1.00 ± 0.70       |
| mg/day (mean ± SD)                   | 26.67 ± 9.42   | 33.33 ± 9.42       | 23.33 ± 12.4   | 26.67 ± 9.42      |
| <b>Statin Type at Time of max FG</b> |                |                    |                |                   |
| Lovastatin (%)                       | 100            | 33.3               | 33.3           | 66.7              |
| Simvastatin (%)                      | 0              | 66.7               | 66.7           | 33.3              |
| DDD (mean ± SD)                      | 0.83 ± 0.23    | 1.67 ± 0.47        | 1.17 ± 0.62    | 1.33 ± 0.47       |
| mg/day (mean ± SD)                   | 33.33 ± 9.42   | 40.00 ± 0.00       | 26.67 ± 9.42   | 40.00 ± 0.00      |
| <b>Pre-Statin</b>                    |                |                    |                |                   |
| Fasting Glucose (mean ± SD)          | 99.33 ± 2.05   | 102.17 ± 3.56      | 88.33 ± 2.62   | 101.33 ± 9.42     |
| Total Cholesterol (mean ± SD)        | 228.67 ± 39.63 | 219.17 ± 39.54     | 232.33 ± 34.45 | 252.00 ± 11.77    |
| LDL (mean ± SD)                      | 157.33 ± 39.74 | 119.00 ± 22.55     | 165.00 ± 36.24 | 162.67 ± 3.29     |
| HDL (mean ± SD)                      | 39.00 ± 4.32   | 34.00 ± 1.63       | 42.67 ± 5.43   | 51.33 ± 7.76      |
| Triglyceride (mean ± SD)             | 162.00 ± 21.22 | 330.00 ± 257.68    | 122.67 ± 18.26 | 190.00 ± 22.37 *  |
| <b>On-statin</b>                     |                |                    |                |                   |
| Fasting Glucose (mean ± SD)          | 98.33 ± 0.47   | 139.33 ± 1.69 **** | 87.67 ± 6.01   | 141.00 ± 39.75    |
| Total Cholesterol (mean ± SD)        | 154.33 ± 10.20 | 164.67 ± 30.81     | 187.00 ± 36.36 | 207.00 ± 8.16     |
| LDL (mean ± SD)                      | 87.00 ± 7.48   | 69.67 ± 9.67       | 106.33 ± 29.04 | 122.33 ± 5.18     |
| HDL (mean ± SD)                      | 40.00 ± 2.94   | 33.67 ± 0.47 *     | 51.67 ± 9.39   | 54.67 ± 4.98      |
| Triglyceride (mean ± SD)             | 138.33 ± 16.53 | 399.67 ± 333.72    | 144.67 ± 9.97  | 151.67 ± 14.61    |
| <b>Delta</b>                         |                |                    |                |                   |
| Fasting Glucose (mean ± SD)          | -1.00 ± 2.44   | 37.17 ± 3.17 ***   | -0.67 ± 3.39   | 39.67 ± 32.49     |
| Total Cholesterol (mean ± SD)        | -74.33 ± 30.30 | -54.50 ± 19.47     | -45.33 ± 11.44 | -45.00 ± 8.48     |
| LDL (mean ± SD)                      | -70.33 ± 32.83 | -49.33 ± 16.04     | -58.67 ± 16.04 | -40.33 ± 7.40     |
| HDL (mean ± SD)                      | 1.00 ± 5.35    | -0.33 ± 1.24       | 9.00 ± 5.65    | 3.33 ± 3.09       |
| Triglyceride (mean ± SD)             | -23.67 ± 6.12  | 69.67 ± 81.97      | 22.00 ± 13.63  | -38.33 ± 12.03 ** |

\*  $P < 0.05$ , \*\*  $P < 0.01$ , \*\*\*  $P < 0.001$ , \*\*\*\*  $P < 0.0001$  case vs. control.

<sup>1</sup> Age at statin initiation

<sup>2</sup> DDD, defined daily dose

<sup>3</sup> Pre-statin clinical characteristics are values taken closest and prior to statin initiation

<sup>4</sup> On-statin clinical characteristics are values taken around the time of maximum fasting glucose during the 3 years after statin initiation

<sup>5</sup> Delta are calculated as on-statin values minus pre-statin values.

## Supplemental Figure 1

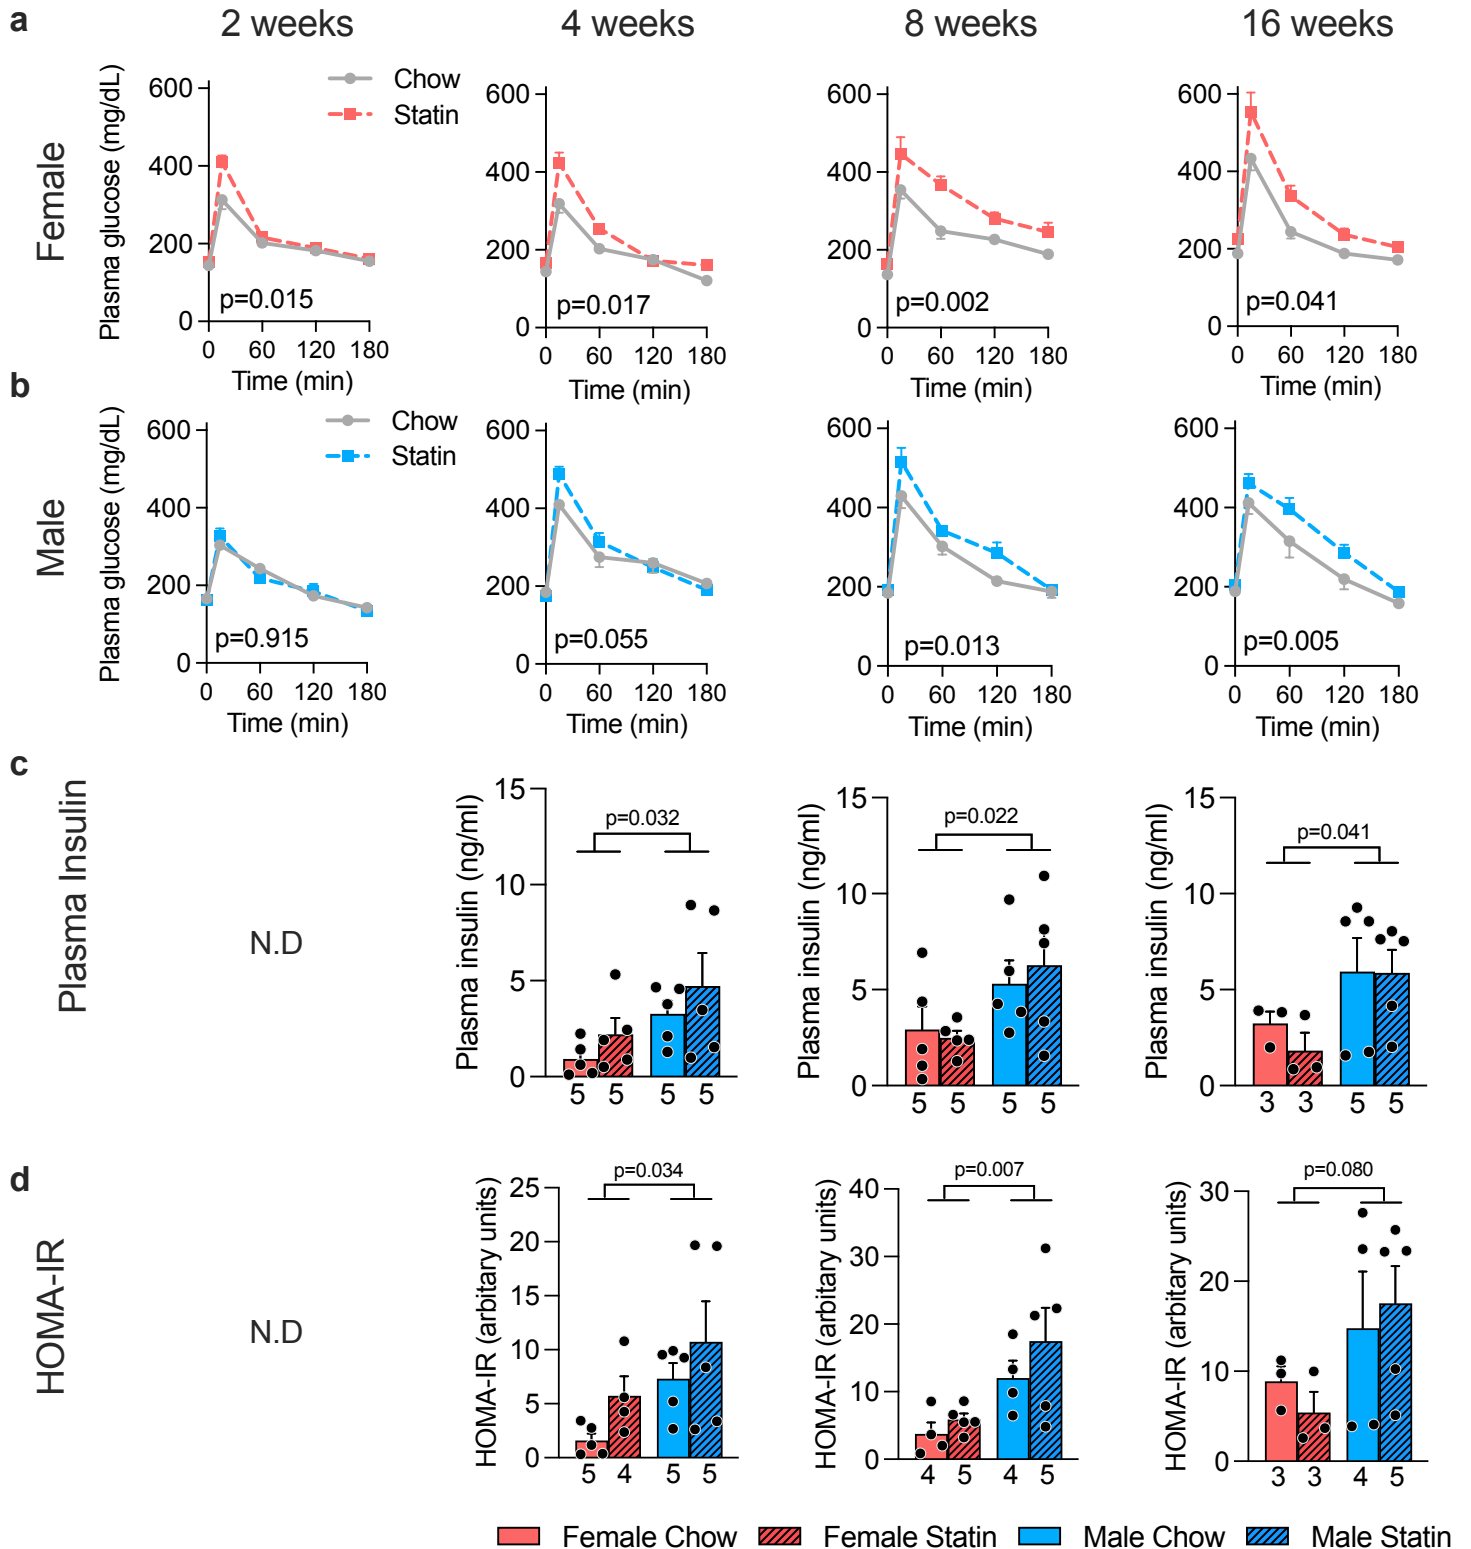

**Suppl. Fig. 1. Glucose tolerance curves, plasma insulin, and HOMA-IR in chow and statin-fed female and male C57BL/6J mice.** (a–b) Glucose tolerance curves for mouse cohorts shown in Fig. 1 d,e. N=5 for each sex and treatment. Data points are mean  $\pm$  SEM. Area under the curve was compared by two-sided t-test and p values shown for control vs. statin treated animals on each graph. (c) Plasma insulin levels and (d) HOMA-IR in mice from Fig. 1d,e are shown as mean  $\pm$  SEM. Data in (c) and (d) were analyzed by 2-way ANOVA, and where significant, subsequent pair-wise comparisons were performed via unpaired two-sided t-test. N for each group is indicated under bars. Source data are provided as a Source Data file.

## Supplemental Figure 2

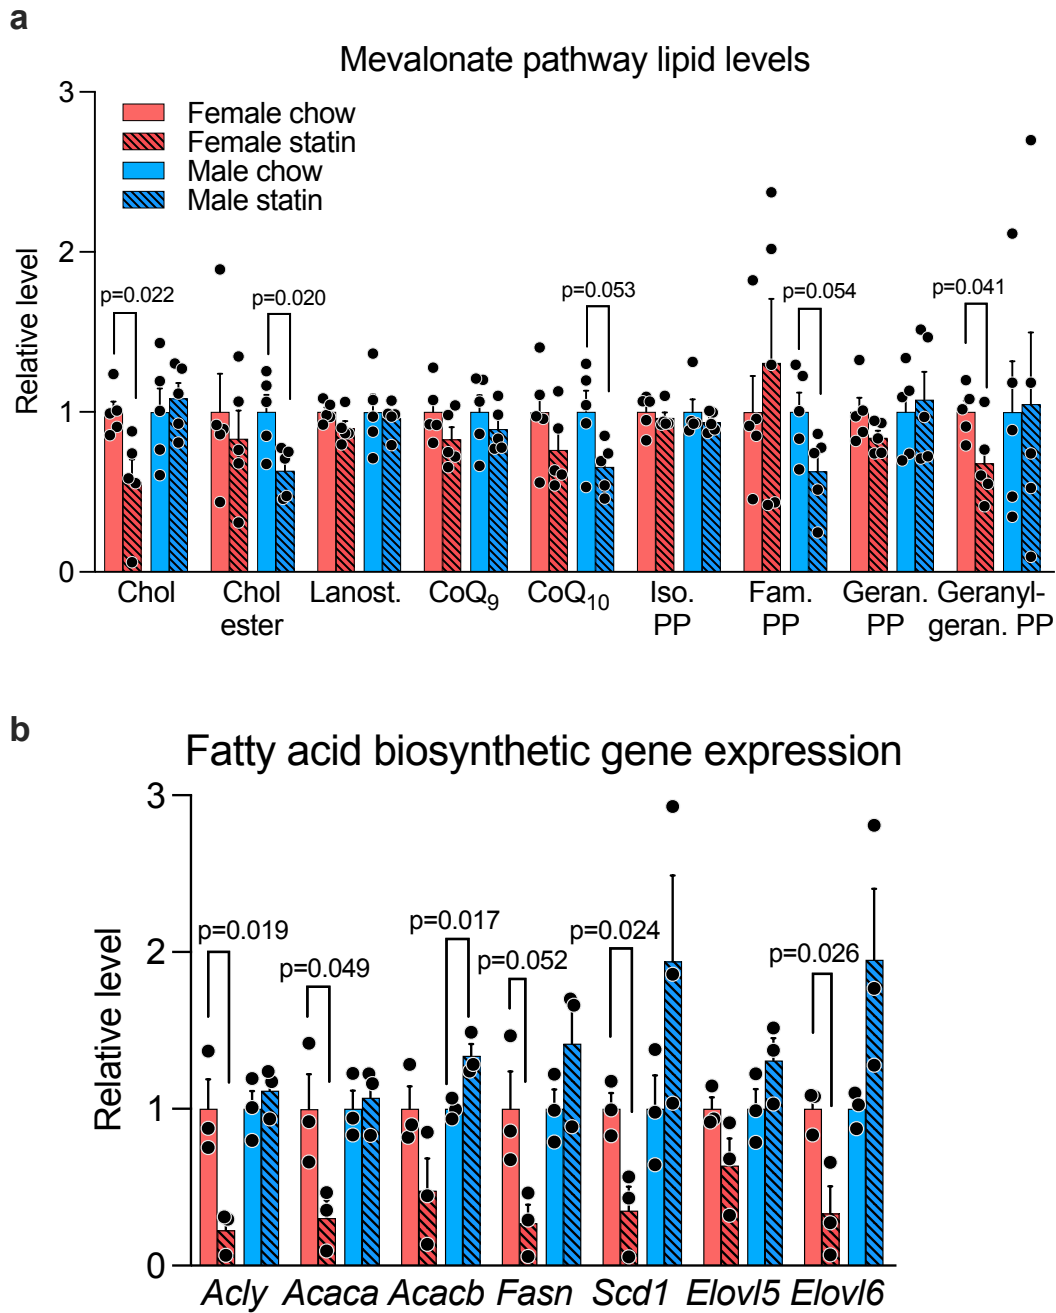

**Suppl. Fig. 2. Sex differences in statin effects on cholesterol pathway intermediates and fatty acid biosynthetic gene expression.** (a) Levels of hepatic lipids within the mevalonate pathway in male and female mice fed chow  $\pm$  statin for 4 weeks (N=5mice/sex and treatment). Data are represented as mean  $\pm$  SEM. Brackets show significant unpaired two-sided t-tests with each sex for specific lipids. Chol, cholesterol; Lanost., lanosterol; CoQ, coenzyme Q; Iso PP, isopentenyl pyrophosphate; Farn. PP, farnesyl pyrophosphate; Geran. PP, geranyl pyrophosphate; Geranylgeran. PP, geranylgeranyl pyrophosphate. (b) Statin-induced alterations in hepatic gene expression for fatty acid synthetic genes from mice shown in panel (a). *Acly*, ATC citrate lyase; *Acaca*, acetyl-CoA carboxylase; *Acacb*, acetyl-CoA carboxylase; *Fasn*, fatty acid synthase; *Scd1*, stearoyl-CoA desaturase 1; *Elovl5*, fatty acid elongase 5; *Elovl6*, fatty acid elongase 6. Values represent mean  $\pm$  SEM. Brackets show significant unpaired two-sided t-tests with each sex for specific mRNAs. Source data are provided as a Source Data file.

### Supplemental Figure 3

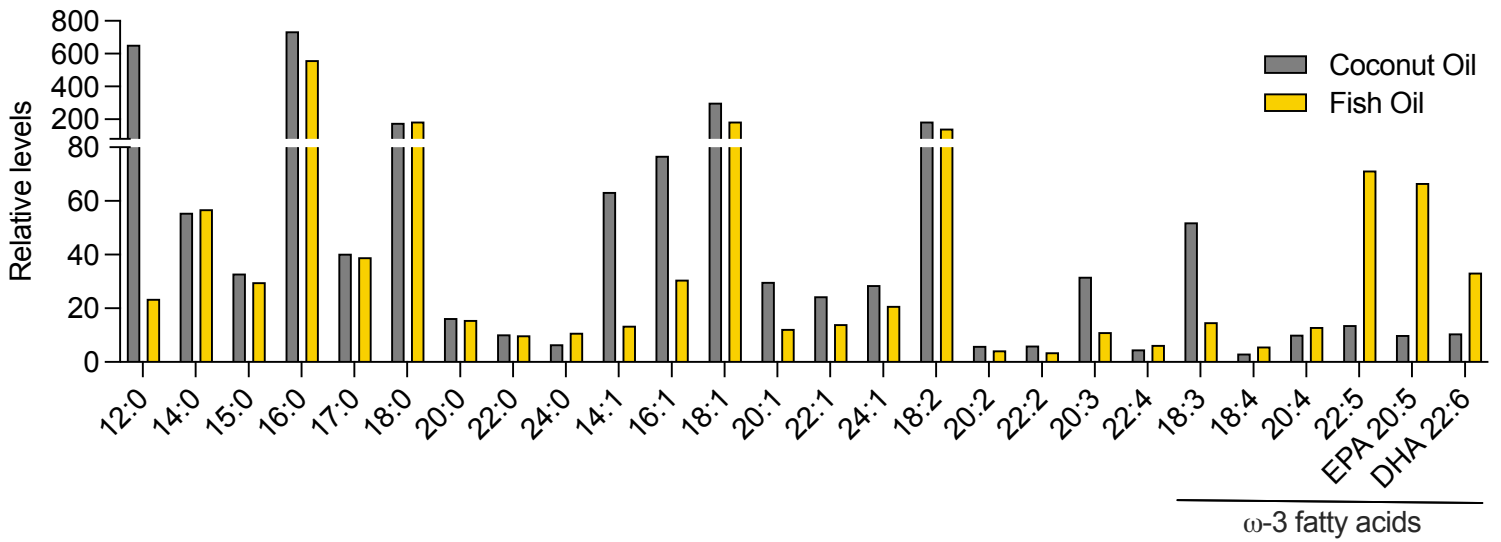

**Suppl. Fig. 3. Fatty acid composition of coconut oil and fish oil used for in vivo studies shown in Figs 2 and 3.** Lipidomic analysis was performed by mass spectrometry and fatty acids are denoted by carbon length:number of double bonds. The  $\omega$ -3 fatty acids are grouped at right. Source data are provided as a Source Data file.

## Supplemental Figure 4

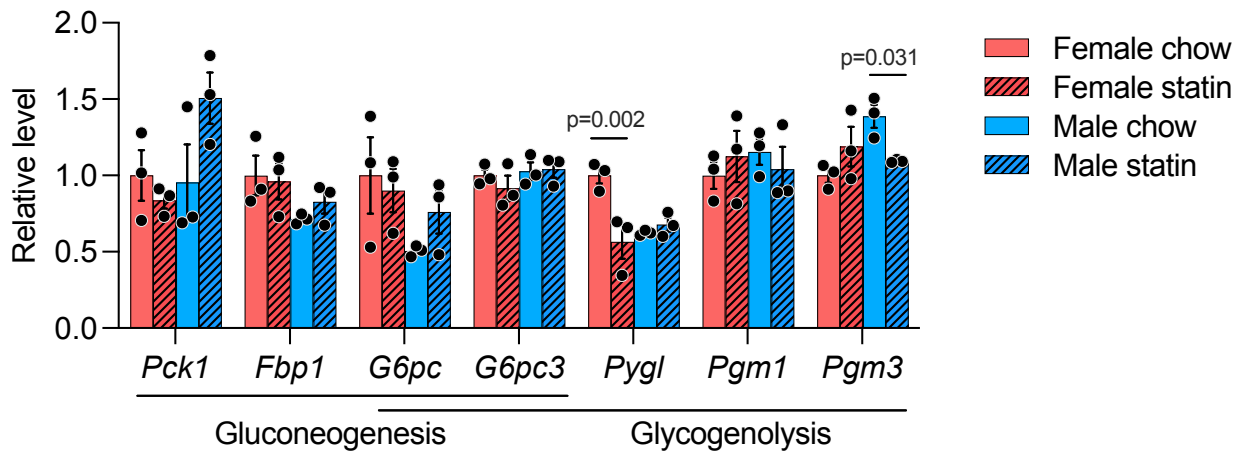

### Suppl. Fig. 4. Gluconeogenesis and glycogenolysis pathway gene expression.

Relative mRNA levels for genes denoted for the two pathways in male and female mice on chow ± statin for 4 weeks. Overlapping lines denote genes with roles in both gluconeogenesis and glycogenolysis. Values represent mean ± SEM. N=3 mice/sex and treatment. Significance determined by 2-way ANOVA followed by unpaired two-sided t-test. *Pck1*, phosphoenolpyruvate carboxykinase 1; *Fbp1*, fructose-bisphosphatase 1; *G6pc* and *G6pc3*, mouse glucose-6-phosphatase catalytic subunits; *Pygl*, glycogen phosphorylase; *Pgm1* and *Pgm3*, phosphoglucomutases. Source data are provided as a Source Data file.

## Supplemental Figure 5

### a Female

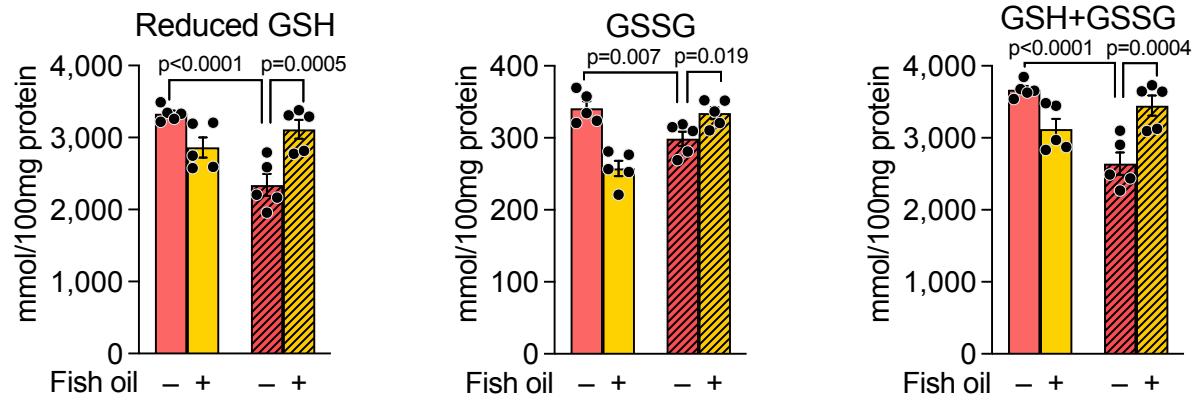

### b Male

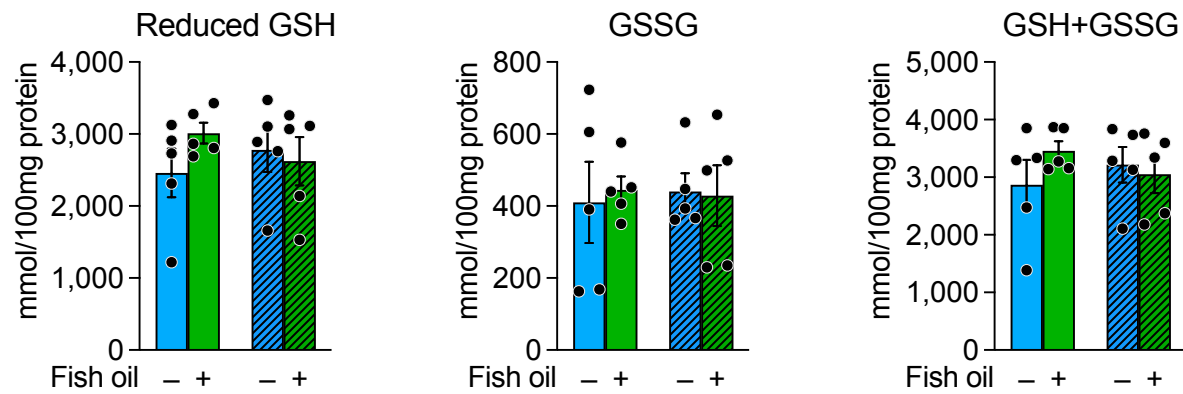

**Suppl. Fig. 5. Glutathione levels in mice shown in Fig. 4g and i.** Levels of reduced glutathione (GSH), oxidized glutathione (GSSG), and the ratio of reduced to oxidized glutathione (GSH/GSSH) were determined in **(a)** female and **(b)** male mice on each treatment (N=5/sex and treatment). Open bars, chow diet; striped bars, chow + statin diet. Data were analyzed by 2-way ANOVA and, where significant, followed by unpaired two-sided t-tests. Brackets represent significance of pairwise comparisons by t-test. Source data are provided as a Source Data file.



Supplemental Figure 6

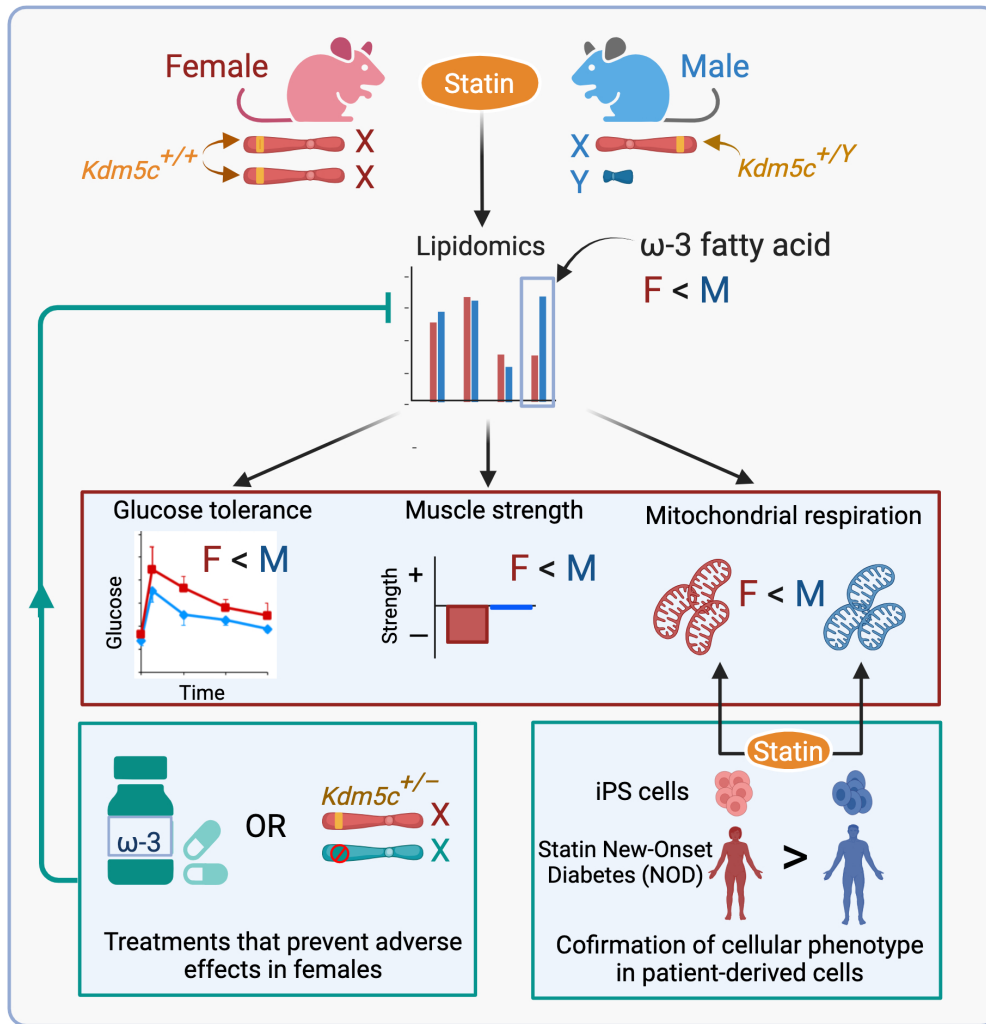

**Suppl. Fig. 6.** Graphical representation of the findings of sex differences in statin adverse effects in the mouse, their correction by ω-3 fatty acid administration or genetic reduction in *Kdm5c* gene dosage, and a validation of sex-biased statin impairment in cellular mitochondrial complex activity in human iPSCs from women that developed statin-related new-onset diabetes. Diagram was created with BioRender.com released under a Creative Commons Attribution-NonCommercial-NoDerivs 4.0 International License.
