# Supplementary material for: X chromosome dosage drives statin-induced dysglycemia and mitochondrial dysfunction
Source: PubMed Central journal article supplement (PMC11219728; doi:10.1038/s41467-024-49764-2), 2024-07-02
Supplement: 41467_2024_49764_MOESM3_ESM.pdf [file 41467_2024_49764_MOESM3_ESM.pdf]

## **DESCRIPTION OF ADDITIONAL SUPPLEMENTARY FILES DOCUMENT**

**Supplementary Data 1** - Metabolomics data in Excel

**Supplementary Data 2** - iPSC origin tables
